# Supplementary material for: Rapid, accurate long- and short-read mapping to large pangenome graphs with vg Giraffe
Source: Research Square preprint supplement (doi:10.21203/rs.3.rs-7747403/v1), 2025-10-23
Supplement: Supplementary file 1 [file c80675342ed9915b92c02337.docx]

Authors also put together a little giraffe demo on the wiki that can be run on a laptop:  [https://github.com/vgteam/vg/wiki/Long-read-giraffe-demo](https://urldefense.com/v3/__https:/github.com/vgteam/vg/wiki/Long-read-giraffe-demo__;!!NLFGqXoFfo8MMQ!qIEqXVRyfzJksy3PYsCYZpTLUD8P_tXBiEPvC6XnQcVfCxZLGs6DPn7Q6cYcI0b2GuETkqDcHD1QOo_t$)
